# Supplementary material for: Comparison of the impact of prolonged low-pressure and standard-pressure pneumoperitoneum on myocardial injury after robot-assisted surgery in the Trendelenburg position: study protocol for a randomized controlled trial
Source: Springer Nature journal article supplement (doi:10.1186/s13063-016-1609-5), 2016-10-10
Supplement: MOESM1 [file 10843080]

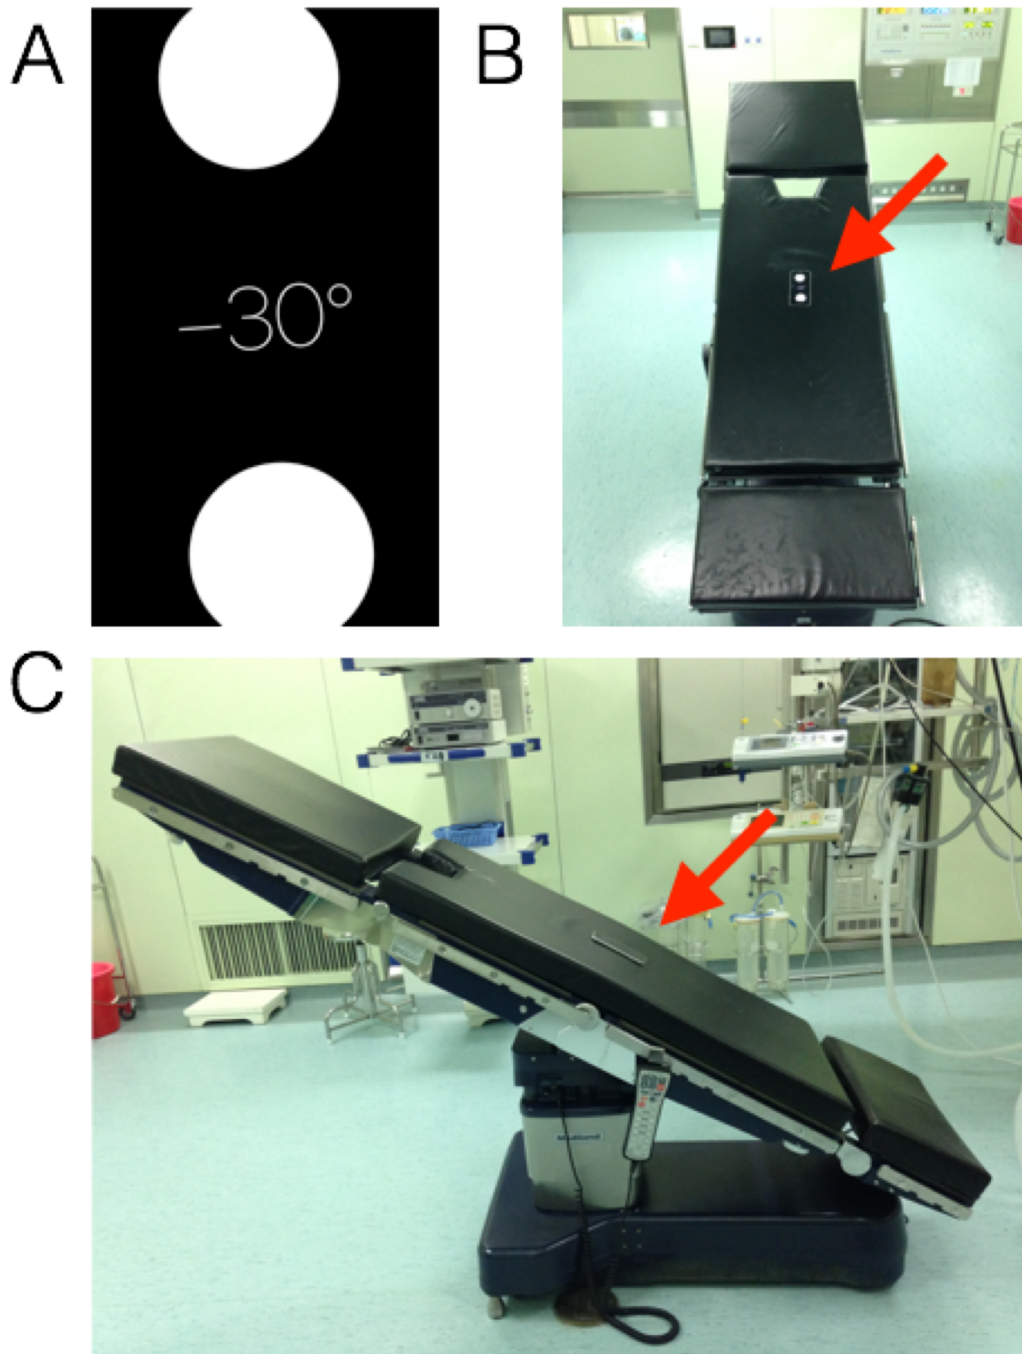

**Figure S1.** Schematic diagram for place the operating table into correct position ( $30^{\circ}$  Trendelenburg position in this study) with smartphone, before surgery. A. snapshot of the in-built snapshot app of iPhone 6S; B&C, adjust the operating table to a certain angle with a smartphone, before surgery. The position of the smartphone are indicated by red arrow.
